# Supplementary material
Source: PubMed Central journal article supplement (PMC3186869)
Supplement: NIHMS317557-supplement-2.pdf [file NIHMS317557-supplement-2.pdf]

**Supplementary Figure:** CT imaging from three patients who responded to re-treatment with TKI despite recurring after receiving adjuvant TKI. Baseline images are on the left and follow-up images (after 2-4 months of TKI) are on the right.
