# Supplementary material
Source: PubMed Central journal article supplement (PMC3186869)

A.

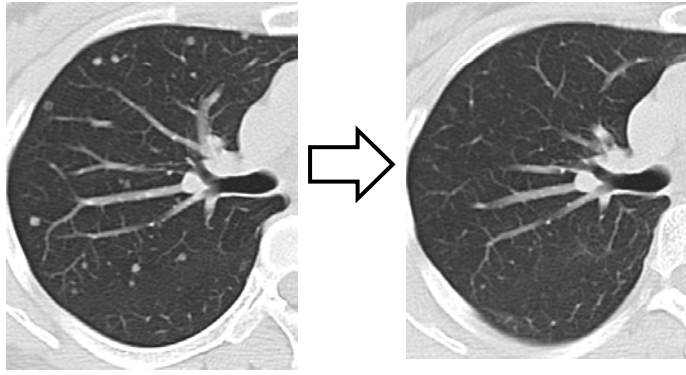

B.

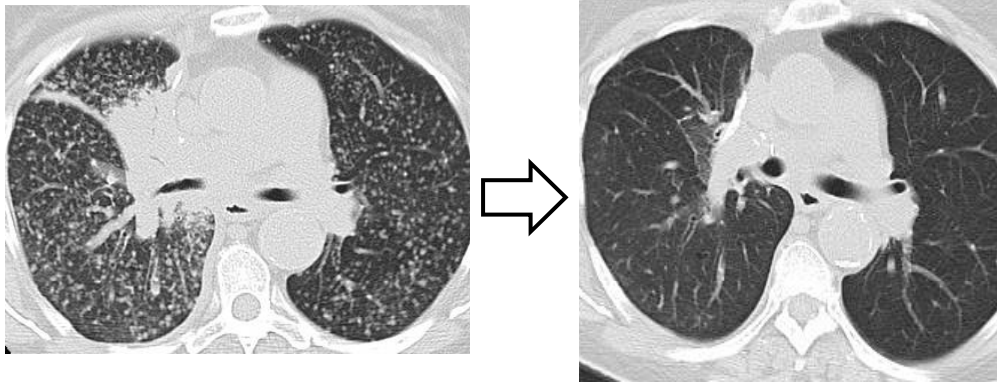

C.

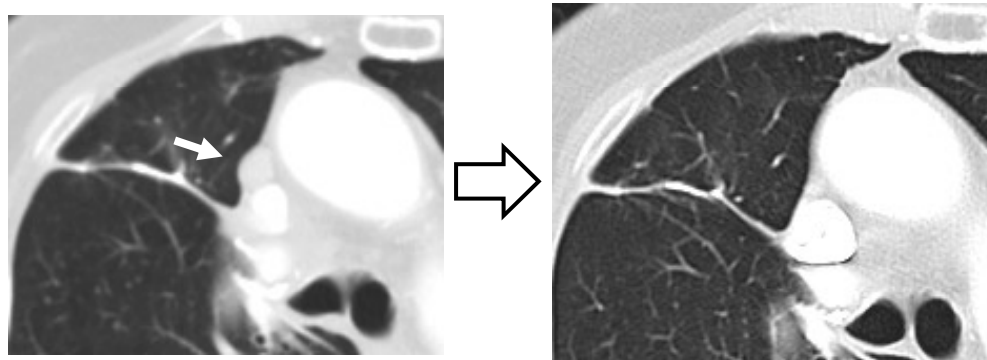

Supplement: NIHMS317557-supplement-1.pdf [file NIHMS317557-supplement-1.pdf]
